# Supplementary material for: Spray-coating semiconducting conjugated polymers for organic thin film transistor applications
Source: Royal Society of Chemistry journal article supplement (doi:10.1039/c4ra03726j), 2014-06-26
Supplement: c4ra03726j1.pdf [file c4ra03726j1.pdf]

## **Electronic Supplementary Information (ESI)**

### **Spray-Coating Semiconducting Conjugated Polymers for Organic Thin Film Transistors Application**

Han-Wen Hsu and Cheng-Liang Liu\*

*Department of Chemical and Materials Engineering, National Central University, Taoyuan  
32001 Taiwan. E-mail: clliu@ncu.edu.tw*

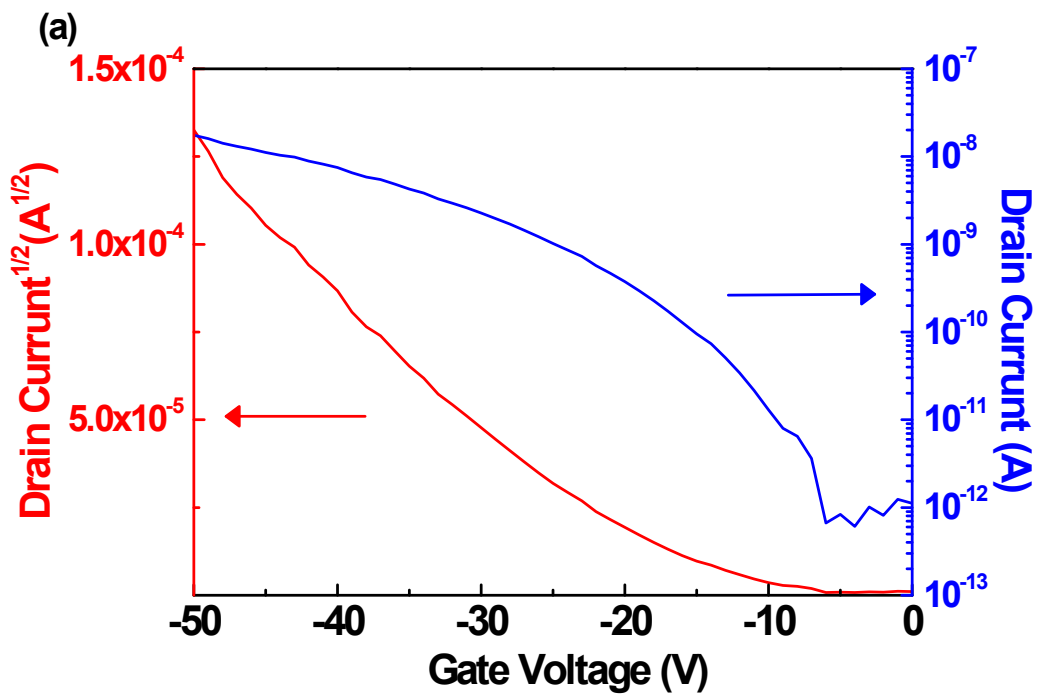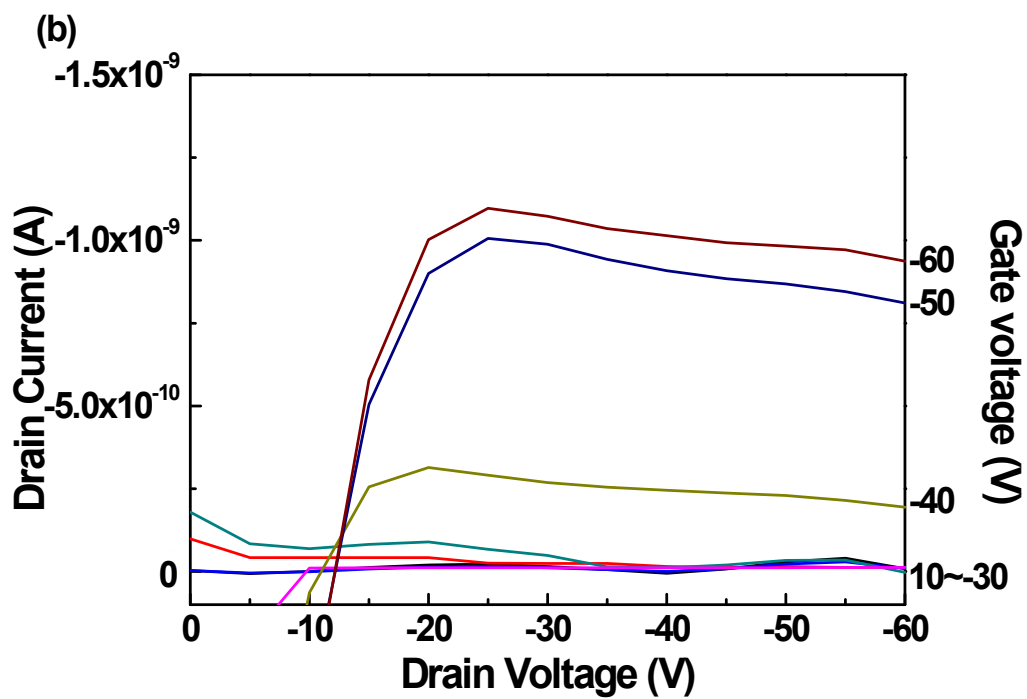

**Fig. S1** (a) Transfer curves and (b) output curves for the spray-coated F8T2 OTFTs on bare SiO<sub>2</sub>/Si substrate.

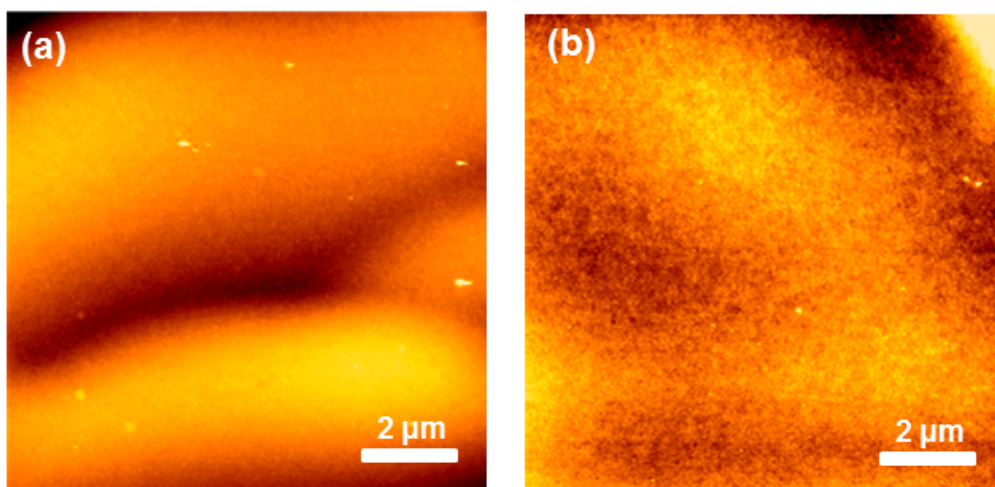

**Fig. S2** AFM image for spray-coated F8T2 thin film on (a) OTS- and (b) PTS- treated surface.

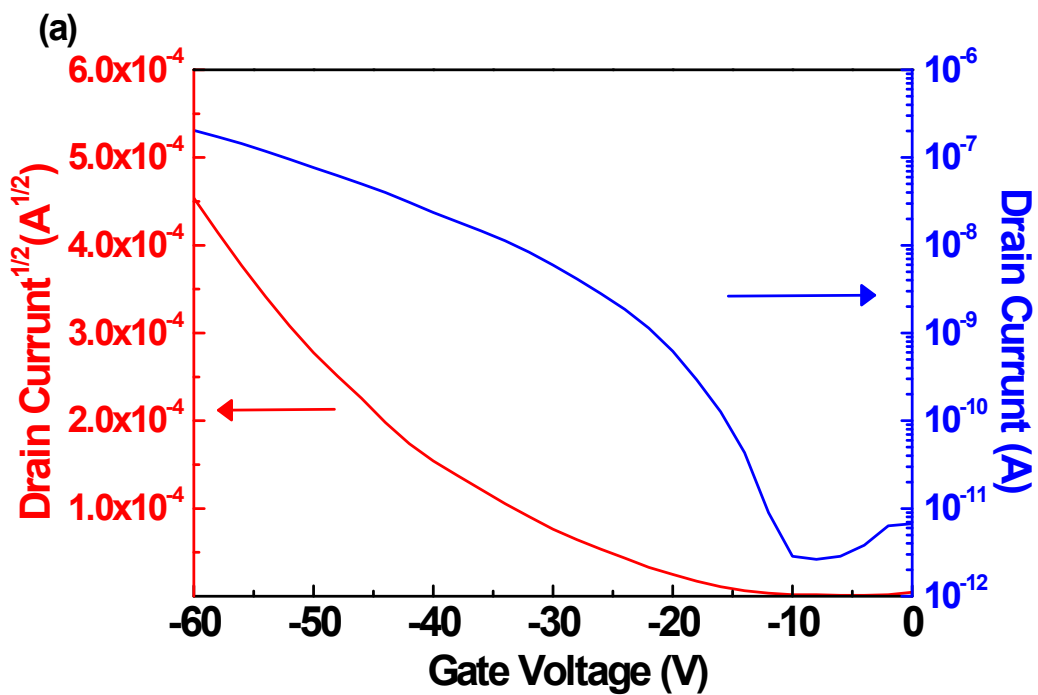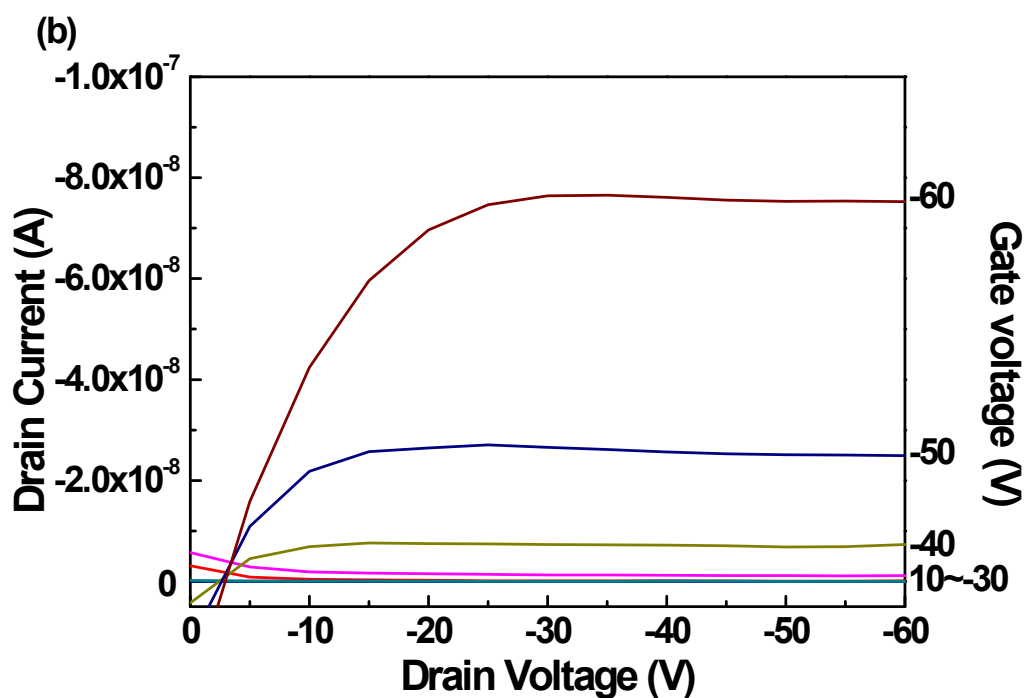

**Fig. S3** (a) Transfer curves and (b) output curves for the spin-coated F8T2 OTFTs on PTS-modified SiO<sub>2</sub>/Si substrate.
